# Supplementary material for: Glial cells in the mouse enteric nervous system can undergo neurogenesis in response to injury
Source: JCI journal article supplement (doi:10.1172/jci58200), 2011-08-25
Supplement: sd1 [file 1]

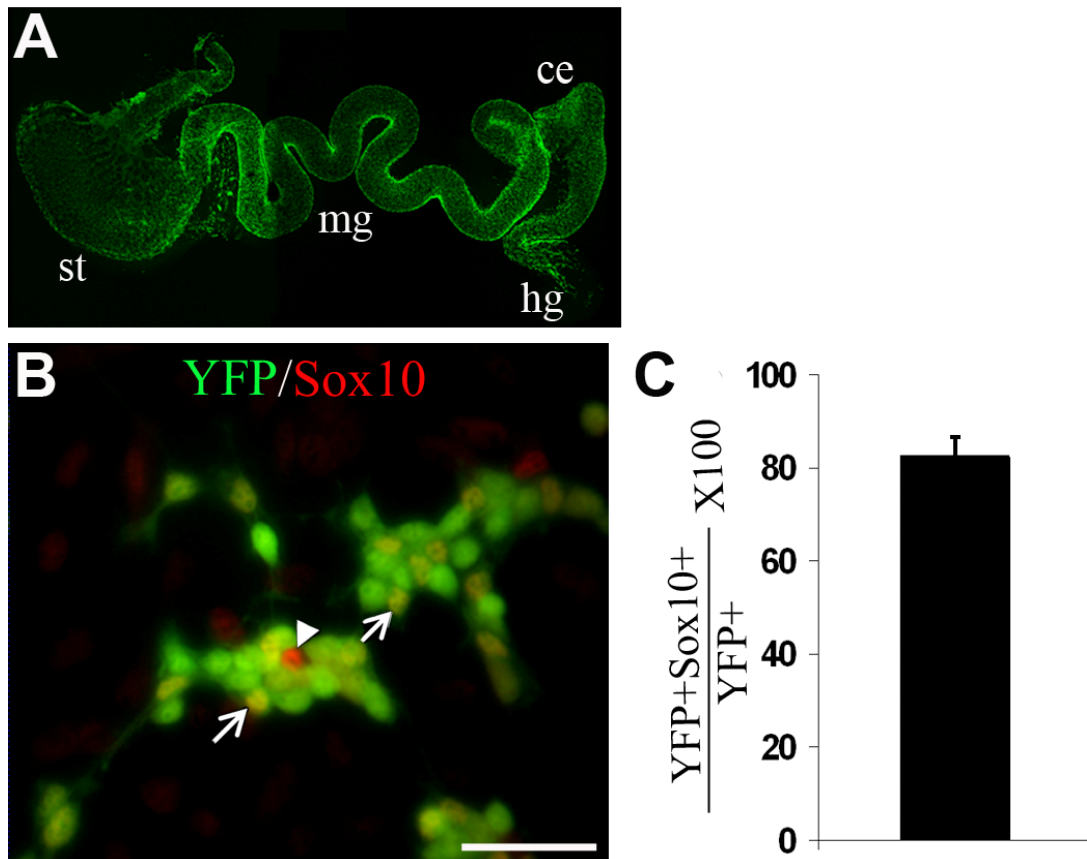

**Supplementary Figure 1. *Sox10::Cre;R26ReYFP* transgenic line was used to lineally mark the progeny of *Sox10*-expressing cells in the ENS.**

**(A)** Laser confocal microscope image of a whole mount gut preparation from an E12.5 *Sox10::Cre;R26ReYFP* embryo immunostained for YFP. **(B)** Short-term cultures of dissociated gut from E16.5 embryos of the same genotype were immunostained for YFP (green) and Sox10 (red). Most Sox10<sup>+</sup> cells undergo Cre-mediated recombination and, therefore, express YFP (arrows). Arrowhead indicates a Sox10<sup>+</sup> cell that does not express YFP. **(C)** Quantification of Sox10<sup>+</sup> cells that undergo Cre-mediated recombination and, therefore, express YFP. Graph error bars, s.e.m. Oe, oesophagus; St, stomach; Mg, midgut; Ce, caecum; Hg, hindgut. Scale bar, 30 μm.

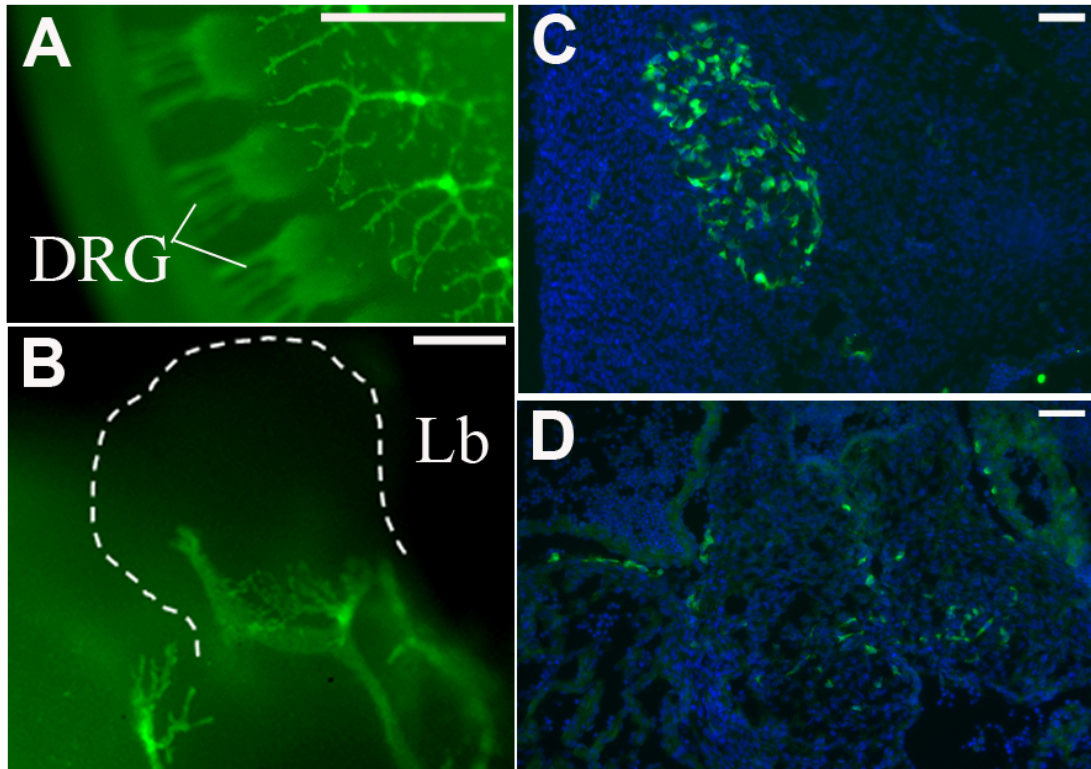

**Supplementary Figure 2. *YFP is appropriately expressed in the Sox10-expressing cells and their derivatives in Sox10::iCreER<sup>T2</sup>;R26ReYFP transgenics.***

**(A-B)** YFP immunostaining of E12.5 *Sox10::iCreER<sup>T2</sup>;R26ReYFP* transgenic embryos exposed to 4-OHT at E9.5. YFP expression was detected in DRG, nerve fibers sprouting from the spinal cord area **(A)** and the radial and ulnar nerves of the limb **(B)**. **(C-D)** YFP immunostaining of coronal sections of E12.5 *Sox10::iCreER<sup>T2</sup>;R26ReYFP* transgenic embryos exposed to 4-OHT at E9.5. YFP expression was detected in the cranial ganglia **(C)** and heart **(D)**. Scale bars, 200  $\mu$ m **(A, B)**; 100  $\mu$ m **(C, D)**.

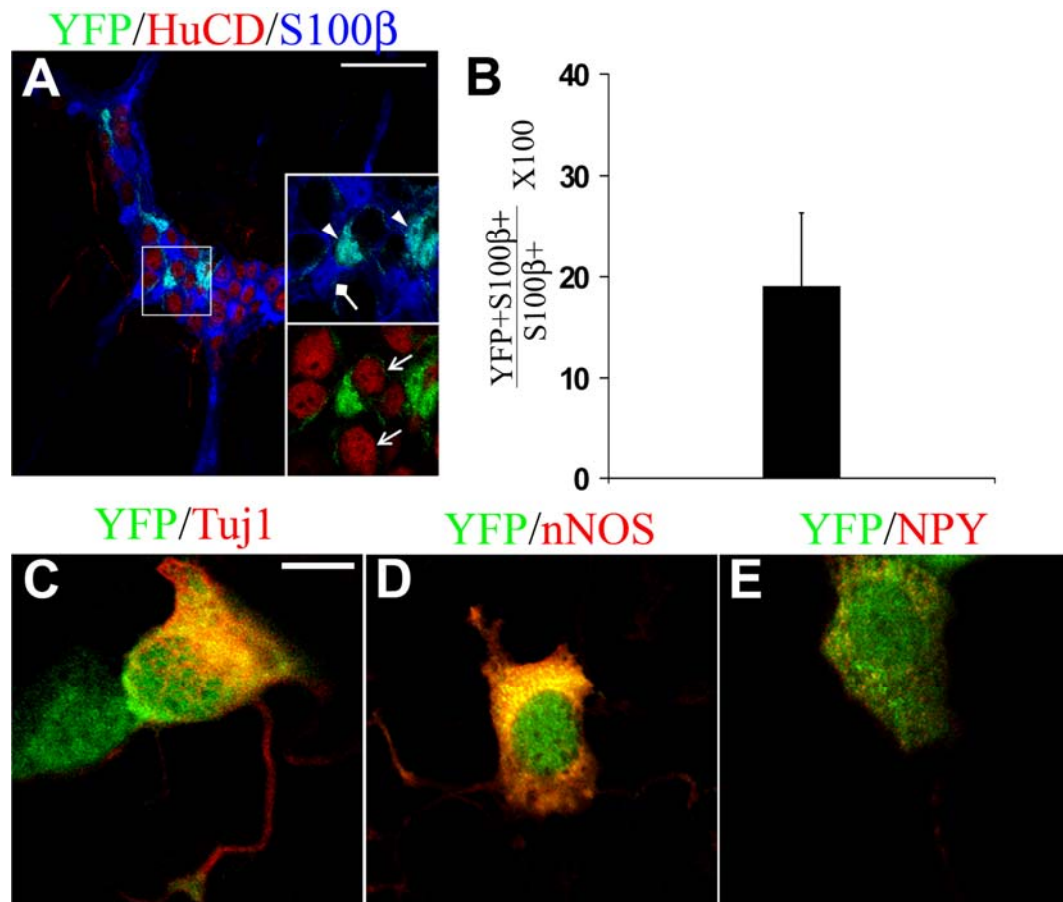

**Supplementary Figure 3. *YFP<sup>+</sup> glial cells from the ENS of *hGFAP::iCreER<sup>T2</sup>;R26ReYFP* transgenics generate neurons in culture.***

**(A)** *hGFAP::iCreER<sup>T2</sup>;R26ReYFP* transgenic mice were treated with 4-OHT (0.2mg/g) at P84 and analysed at P140. Immunostaining of MS-MP whole mount preparations for YFP (green), HuC/D (red) and S100β (blue) showed that YFP expression is restricted to the S100β<sup>+</sup> population (arrowheads in inset of panel **A**). No YFP<sup>+</sup>HuC/D<sup>+</sup> cells were found. Arrows and diamond arrows in insets of panel **A** point to YFP<sup>-</sup>HuC/D<sup>+</sup>S100β<sup>-</sup> and YFP<sup>-</sup>HuC/D<sup>-</sup>S100β<sup>-</sup>, respectively. **(B)** Quantification of the fraction of YFP<sup>+</sup> cells in the S100β<sup>+</sup> population. The error bars indicate s.e.m. **(C-E)** Cell cultures from dissociated MS-MP strips were immunostained for YFP (green), the pan-neuronal marker Tuj1 (red, **C**) or the neuronal subtype marker nNOS (red, **D**) and NPY (red, **E**). Scale bars, 60 μm (**A**); 10 μm (**C-E**).
